# Supplementary material
Source: Springer Nature journal article supplement (https://www.springerprofessional.de/resource/supplementary/13673_2013_35_MOESM5_ESM.pdf/11899362)

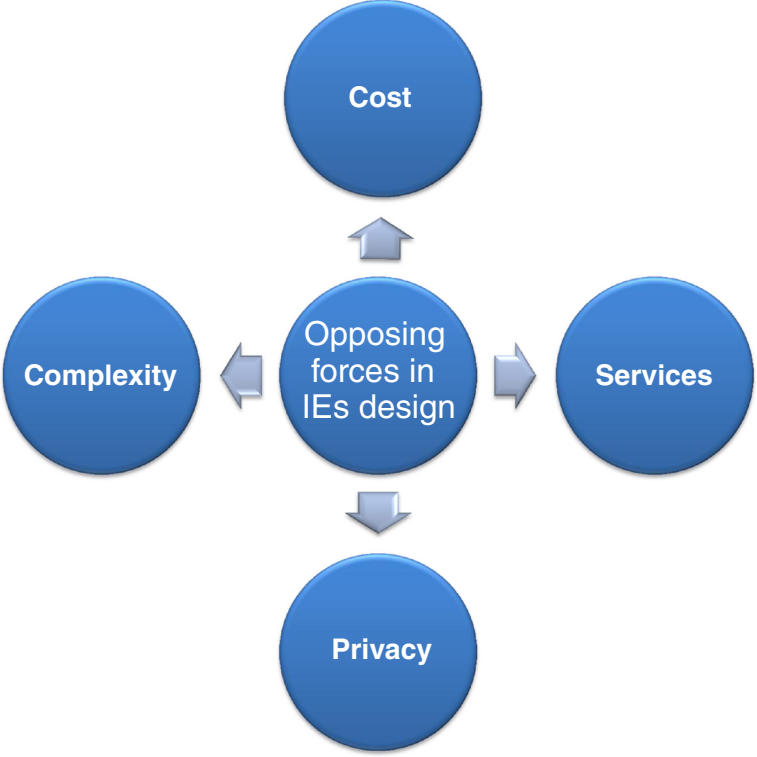

**Cost**

**Complexity**

**Opposing forces in IEs design**

**Services**

**Privacy**

Supplement: MOESM5 [file 11899362]
